# Supplementary material
Source: Springer Nature journal article supplement (https://www.springermedizin.de/resource/supplementary/12992_2011_139_MOESM1_ESM.pdf/9616544)

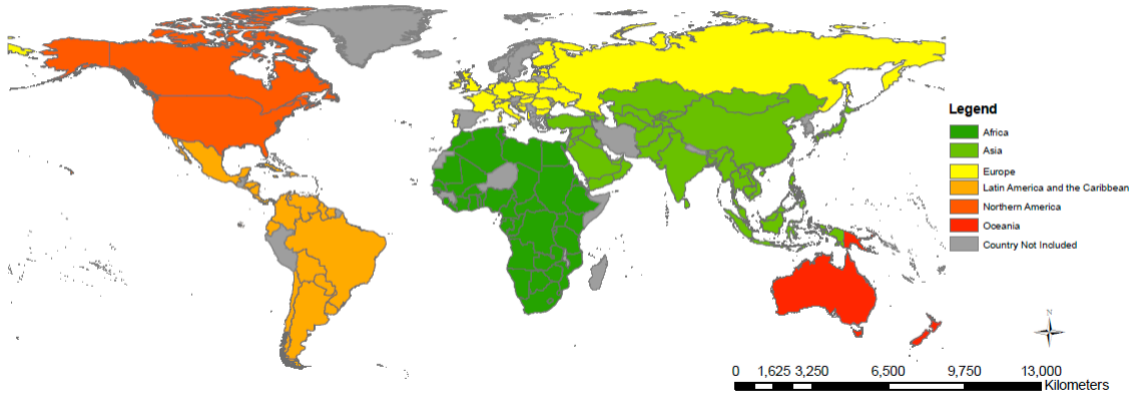

Supplement: MOESM1 [file 9616544]
